# Supplementary material for: Regulation of Intracellular Reactive Oxygen Species Levels after the Development of Phallus rubrovolvatus Rot Disease Due to Trichoderma koningii Mycoparasitism
Source: MDPI journal article supplement (doi:10.3390/jof9050525), 2023-04-28
Supplement: s1 [file s1]

**Table S1.** GenBank accession numbers of taxa used in phylogenetic analyses.

| Species name               | Strain number            | GenBank accession number |               |
|----------------------------|--------------------------|--------------------------|---------------|
|                            |                          | ITS                      | EF1- $\alpha$ |
| <i>Protocrea farinosa</i>  | CBS 121551               | MH863119                 | EU703889      |
| <i>Protocrea pallida</i>   | CBS 299.78               | MH861137                 | EU703900      |
| <i>T. achlamydosporum</i>  | YMF 1.06226*             | MN977791                 | MT070156      |
| <i>T. afarasin</i>         | CBS 130755*/GJS 99-227   | AY027784                 | AF348093      |
| <i>T. afroharzianum</i>    | CBS 124620*/GJS 04-186   | FJ442265                 | FJ463301      |
| <i>T. amoenum</i>          | YMF 1.06210/YMF_1.6188   | MN977802                 | MT070145      |
| <i>T. amoenum</i>          | YMF 1.06209              | MN977801                 | MT070146      |
| <i>T. anaharzianum</i>     | YMF 1.00383*             | MH113931                 | MH183182      |
| <i>T. anaharzianum</i>     | YMF 1.00241              | MH262584                 | MH236493      |
| <i>T. asiaticum</i>        | YMF 1.00352*             | MH113930                 | MH183183      |
| <i>T. asperellum</i>       | CBS 433.97=TR3*          | AY380912                 | AY376058      |
| <i>T. atrobrunneum</i>     | T42                      | KX632515                 | KX632629      |
| <i>T. atroviride</i>       | TRS26                    | KJ786751                 | KJ786832      |
| <i>T. camerunense</i>      | CBS 137272*/GJS 99-230   | AY027780                 | AF348107      |
| <i>T. endophyticum</i>     | CBS 130729*/DIS 217A     | FJ442243                 | FJ463319      |
| <i>T. gamsii</i>           | G.J.S. 04-09             | DQ315459                 | DQ307541      |
| <i>T. guizhouense</i>      | S278                     |                          | KF134799      |
| <i>T. harzianum</i>        | CBS 226.95*              | AJ222720                 | AF348101      |
| <i>T. harzianum</i>        | TRS55                    | KP009211                 | KP008803      |
| <i>T. hunanense</i>        | HMAS 248841*             | KY687924                 | KY688039      |
| <i>T. inconspicuum</i>     | YMF 1.04623*             | MK795993                 | MK795985      |
| <i>T. inhamatum</i>        | CBS 273.78*              | FJ442680                 | AF348099      |
| <i>T. koningii</i>         | Hypo 51=CBS 119500       | FJ860762                 | KC285594      |
| <i>T. koningiopsis</i>     | 18ASMA001                | MT520621                 | MT671922      |
| <i>T. lentiforme</i>       | CBS 100542*/GJS 98-6     | AF469189                 | AF469195      |
| <i>T. lixii</i>            | CBS 110080*/G.J.S. 97-96 | AF443920                 | AF443938      |
| <i>T. longiphialidicum</i> | TC668                    |                          | MF095879      |
| <i>T. longipilis</i>       | CBS 120953               |                          | FJ860643      |
| <i>T. longisporum</i>      | HMAS 248843*             | KY687926                 | KY688043      |
| <i>T. ovalisporum</i>      | DIS 70a=CBS 113299*      | AY380897                 | AY376037      |
| <i>T. petersenii</i>       | CBS 119507=Hypo 45       | FJ860806                 | FJ860670      |
| <i>T. pollinicola</i>      | LC11682 = LF1542*        | MF939592                 | MF939619      |
| <i>T. polypori</i>         | HMAS 248855*             | KY687938                 | KY688058      |
| <i>T. propepolypori</i>    | YMF 1.06199/YMF_1.6176   | MN977790                 | MT070157      |
| <i>T. propepolypori</i>    | YMF 1.06224*/YMF_1.6175  | MN977789                 | MT070158      |
| <i>T. pseudoasiaticum</i>  | YMF 1.06200*/YMF_1.6178  | MN977792                 | MT070155      |
| <i>T. pseudokoningii</i>   | G.J.S. 81-300            | DQ083025                 | AY937429      |
| <i>T. pyramidale</i>       | CBS 135574*              |                          | KJ665699      |
| <i>T. reesei</i>           | G.J.S. 97-38             | AJ004962                 | JN175603      |
| <i>T. rifaii</i>           | CBS 130745/DIS 337F      | FJ442621                 | FJ463321      |
| <i>T. simile</i>           | YMF 1.06201*             | MN977793                 | MT070154      |

|                               |                           |                 |                 |
|-------------------------------|---------------------------|-----------------|-----------------|
| <i>T. simmonsii</i>           | CBS 130431*/G.J.S. 91-138 | AF443917        | AF443935        |
| <i>T. spirale</i>             | TRS111                    | KP009301        | KP008963        |
| <i>T. subazureum</i>          | YMF 1.06207*              | MN977799        | MT070148        |
| <i>T. subuliforme</i>         | YMF 1.06204*              | MN977796        | MT070151        |
| <i>T. supraverticillatum</i>  | YMF 1.06208*/YMF_1.6186   | MN977800        | MT070147        |
| <i>T. tibetica</i>            | YMF 1.05583*              | MK779177        | MK779179        |
| <i>T. tomentosum</i>          | S23                       |                 | KJ665759        |
| <i>T. velutinum</i>           | C.P.K. 298                |                 | KJ665769        |
| <i>T. virens</i>              | Gli39=CBS 249.59          | AF099005        | AF534631        |
| <i>T. viride</i>              | CBS 119325                | DQ677655        | DQ672615        |
| <i>T. atroviride</i>          | CBS 119499 = Hypo 326     | FJ860726        | FJ860611        |
| <b><i>T. koningiopsis</i></b> | <b>NY120302</b>           | <b>OP604600</b> | <b>OP620745</b> |
| <b><i>T. asperellum</i></b>   | <b>NY120304H</b>          | <b>OP604601</b> | <b>OP620746</b> |
| <b><i>T. pollinicola</i></b>  | <b>PL21811-12-2</b>       | <b>OP604602</b> | <b>OP620747</b> |
| <b><i>T. pollinicola</i></b>  | <b>PL218116D</b>          | <b>OP604603</b> | <b>OP620748</b> |
| <b><i>T. lixii</i></b>        | <b>PL218119D</b>          | <b>OP604604</b> | <b>OP620749</b> |
| <b><i>T. pollinicola</i></b>  | <b>QX211008-2</b>         | <b>OP604605</b> | <b>OP620750</b> |
| <b><i>T. tomentosum</i></b>   | <b>XY101301</b>           | <b>OP604606</b> | <b>OP620751</b> |
| <b><i>T. tomentosum</i></b>   | <b>XY101314</b>           | <b>OP604607</b> | <b>OP620752</b> |
| <b><i>T. koningii</i></b>     | <b>PL110114</b>           | <b>OP604608</b> | <b>OP620753</b> |

The type and ex-type strains are indicated with \* after the strain number.

Our 9 strains introduced in this study are indicated in bold.
